# Supplementary material for: Sigma-1 Receptor (S1R) Interaction with Cholesterol: Mechanisms of S1R Activation and Its Role in Neurodegenerative Diseases
Source: MDPI journal article supplement (doi:10.3390/ijms22084082), 2021-04-15
Supplement: s1 [file s1]

**Supplementary table 2. Extracellular matrix component**

| <b>Gene</b> | <b>Name</b>                                         | <b>Fold enrichment</b> | <b>P-value</b> |
|-------------|-----------------------------------------------------|------------------------|----------------|
| NENF        | Neudesin                                            | 10.6                   | 0.0003         |
| LAMB2       | Laminin subunit beta 2                              | 13.5                   | 0.001          |
| MANF        | Mesencephalic astrocyte-derived neurotrophic factor | 80.6                   | 0.001          |
| GPC1        | Glypican-1                                          | 7.8                    | 0.001          |
| LAMB1       | laminin subunit beta 1                              | 17.5                   | 0.002          |
| RXDN        | Peroxidasin                                         | 6.5                    | 0.002          |
| SULF2       | Extracellular sulfatase Sulf-2                      | 12.8                   | 0.002          |
| GALS3BP     | Galectin 3 binding protein                          | 2.7                    | 0.003          |
| TGFB1       | Transforming growth factor beta induced             | 16.0                   | 0.003          |
| LGALS3BP    | Galectin-3-binding protein                          | 2.7                    | 0.003          |
| LAMC1       | Laminin subunit gamma 1                             | 7.4                    | 0.008          |
| COL6A1      | Collagen type VI alpha 1 chain                      | 7.6                    | 0.01           |
| BCHE        | Cholinesterase                                      | 3.1                    | 0.01           |
| COL12A1     | collagen type XII alpha 1 chain                     | 51.0                   | 0.016          |
| AGRN        | Agrin                                               | 5.6                    | 0.02           |
| MYDGF       | Myeloid-derived growth factor                       | 109.9                  | 0.02           |
| CFH         | Complement factor H                                 | 13.4                   | 0.02           |
| FBLN1       | Fibulin 1                                           | 3.6                    | 0.027          |
| GPC5        | Glypican-5                                          | 10.3                   | 0.03           |
| BMP1        | Bone morphogenetic protein 1                        | 5.8                    | 0.03           |
| FBLN1       | Fibulin-1                                           | 3.6                    | 0.03           |

|        |                                   |      |      |
|--------|-----------------------------------|------|------|
| COL7A1 | Collagen type VII alpha 1 chain   | 16.2 | 0.04 |
| TGFB2  | Transforming growth factor beta 2 | 3.4  | 0.04 |
| SAP    | Prosaposin                        | 36.0 | 0.04 |
| FUCA2  | Plasma alpha-L-fucosidase         | 29.4 | 0.04 |
| COL5A1 | Collagen type V alpha 1 chain     | 14.6 | 0.05 |
