# Supplementary material for: Sigma-1 Receptor (S1R) Interaction with Cholesterol: Mechanisms of S1R Activation and Its Role in Neurodegenerative Diseases
Source: MDPI journal article supplement (doi:10.3390/ijms22084082), 2021-04-15
Supplement: s1 [file s1]

**Supplementary table 3. Cell surface proteins and receptors**

| <b>Gene</b> | <b>Name</b>                                               | <b>Fold enrichment</b> | <b>P-value</b> |
|-------------|-----------------------------------------------------------|------------------------|----------------|
| CD109       | CD109 molecule                                            | 11.0                   | 0.001          |
| ITGA1       | Integrin subunit alpha 1                                  | 3.1                    | 0.001          |
| ITGAV       | Integrin subunit alpha V                                  | 20.5                   | 0.001          |
| NRP1        | Neuropilin 1                                              | 4.2                    | 0.001          |
| PCSK9       | Proprotein convertase subtilisin/kexin type 9             | 10.9                   | 0.001          |
| TRABD2A     | Metalloprotease TIKI1                                     | 16.5                   | 0.001          |
| SEMA3B      | Semaphorin-3B                                             | 4.8                    | 0.001          |
| OSMR        | Oncostatin-M-specific receptor subunit beta               | 3.4                    | 0.001          |
| CNTNAP1     | Contactin-associated protein 1                            | 35.0                   | 0.003          |
| ADAM10      | ADAM metallopeptidase domain 10                           | 9.7                    | 0.004          |
| APLP2       | Amyloid-like protein 2                                    | 5.7                    | 0.004          |
| NOTCH2      | Notch 2                                                   | 2.6                    | 0.005          |
| ADAM9       | ADAM metallopeptidase domain 9                            | 12.2                   | 0.008          |
| CACNA2D1    | Voltage-dependent calcium channel subunit alpha-2/delta-1 | 19.6                   | 0.008          |
| EGFR        | Epidermal growth factor receptor                          | 4.8                    | 0.009          |
| ITGB1       | Integrin subunit beta 1                                   | 5.2                    | 0.01           |
| ITGB5       | Integrin subunit beta 5                                   | 4.2                    | 0.01           |
| LRRC8A      | Leucine rich repeat containing 8 family member A          | 3.2                    | 0.01           |
| LRRC8A      | Volume-regulated anion channel subunit LRRC8A             | 3.2                    | 0.01           |
| IGF2R       | Insulin like growth factor 2 receptor                     | 2.6                    | 0.02           |
| PLXNB2      | Plexin B2                                                 | 11.0                   | 0.02           |
| PVR         | Poliovirus receptor                                       | 5.0                    | 0.02           |
| SCARB1      | Scavenger receptor class B member 1                       | 9.4                    | 0.02           |
| LBR         | Lamin-B receptor                                          | 4.6                    | 0.02           |
| ADAM15      | ADAM metallopeptidase domain 15                           | 16.2                   | 0.03           |
| APP         | Amyloid beta precursor protein                            | 6.7                    | 0.03           |
| SLC39A6     | Solute carrier family 39 member 6                         | 9.6                    | 0.03           |

|         |                                                      |      |      |
|---------|------------------------------------------------------|------|------|
| SLC39A6 | Zinc transporter ZIP6                                | 9.6  | 0.03 |
| CTNND1  | Catenin delta-1                                      | 3.0  | 0.03 |
| L1CAM   | L1 cell adhesion molecule                            | 10.6 | 0.04 |
| ITGA3   | Integrin subunit alpha 3                             | 7.3  | 0.04 |
| ITGA5   | Integrin subunit alpha 5                             | 9.0  | 0.04 |
| AXL     | AXL receptor tyrosine kinase                         | 2.7  | 0.05 |
| LRPAP1  | LDL receptor related protein<br>associated protein 1 | 17.3 | 0.05 |
| HM13    | Histocompatibility minor 13                          | 5.2  | 0.05 |
| NEGR1   | Neuronal growth regulator 1                          | 4.2  | 0.05 |
